# Supplementary material for: Relationships among COVID-19 causal factors perceived by children, basic psychological needs and social anxiety
Source: PeerJ. 2025 Jan 31;13:e18828. doi: 10.7717/peerj.18828 (PMC11789665; doi:10.7717/peerj.18828)
Supplement: Supplemental Information 1 [file peerj-13-18828-s001.xlsx]

## Sheet: Hoja1
1	1	1	6	5	21.541	21.541	1.5	2	150	120	170	190	140	150	100	110	3	1	4	1	3	3	4	2	2	2	3	4	3	3	3	4	3	2	0	4	2	4	4	2	3	3	2	1	3	4	3	2	4
2	1	1	8	0	27.398	30.3265	3.5	5	100	110	200	150	80	80	110	90	0	4	0	0	4	0	0	0	0	4	0	4	0	0	0	3	0	0	0	0	0	0	0	0	0	0	0	0	0	0	0	0	4
3	0	1	4	4	21.541	27.398	1.5	4	80	80	130	180	80	130	120	100	2	1	3	4	2	3	0	3	0	0	0	4	0	0	1	4	0	1	0	2	0	2	4	1	2	1	0	1	3	0	4	0	2
4	1	1	7	8	27.398	33.255	4	5.5	60	70	160	140	150	90	130	100	0	0	4	0	4	0	0	0	0	0	0	4	0	0	0	4	0	0	0	2	0	0	3	0	2	0	0	0	1	0	0	0	4
6	0	1	6	7	21.541	24.4695	2	2.5	130	140	130	200		180	100	160	3	2	4	1	3	2	1	1	1	2	3	3	2	2	2	1	2	1	1	2	2	3	1	2	3	4	2	1	4	1	2	2	3
7	1	1	10	6	33.255	36.1835	6	7	70	90	170	180	160	150	120	110	0	0	1	0	4	0	0	2	0	0	0	4	1	0	0	4	0	0	1	1	0	2	4	0	1	0	0	0	0	0	0	0	4
9	1	1	3		18.6125	18.6125	1	1	100	180	70		60		50		3	0	2	0	2	0	2	1	0	0	0	1	0	0	2	2	0	1	3	0	0	0	0	1	0	0	0	0	0	0	0	0	2
10	1	1	10	5	27.398	27.398	3.5	3.5	80	120	160	200	150	160	120	120	1	0	4	0	4	0	0	1	0	0	0	4	2	0	0	4	0	3	4	0	0	2	0	0	2	0	0	0	3	0	0	0	4
11	1	1	10	4	27.398	33.255	4	6	50	100	190	180	150	140	130	60	1	0	3	0	4	1	0	0	0	0	0	4	4	0	0	4	2	0	1	1	0	1	3	0	4	0	0	0	1	0	0	0	4
12	1	1	5	4	21.541	24.4695	2	3	100	100	140	180	110	150	110	80	2	0	3	0	1	1	2	0	2	2	0	0	3	2	1	3	2	0	4	1	0	2	2	12	2	1	2	3	3	0	1	1	30
13	1	1	10	10	21.541	21.541	2	1.5	70	110	200	180	80	190	90	90	0	4	4	0	0	0	0	0	4	4	0	4	0	0	0	3	0	0	4	0	0	0	0	0	0	0	0	0	0	0	0	0	4
14	1	1	10	10	18.6125	18.6125	1	1	110	170	100	180	70	200	90	170	3	0	3	0	2	0	1	1	0	0	0	4	1	2	2	0	0	2	4	0	2	2	2	0	3	0	0	0	3	0	0	0	4
15	1	1	4	4	27.398	33.255	3.5	5.5	80	90	150	210	160	160	120	110	2	0	2	0	4	0	0	4	0	0	0	4	4	0	0	4	4	0	1	3	0	1	0	0	3	0	0	0	4	0	0	0	4
16	0	1	10	4	21.541	30.3265	2	5	200	80	220	200	130	150		120	0	0	3	0	4	0	0	0	0	0	4	0	0	0	4	0	0	0	1	2	1	0	0	0	3	1	0	0	0	0	0	0	4
17	0	1	6	4	18.6125	21.541	1	1.5	80	70	220	250	200	160	110	140	0	0	0	0	4	0	0	0	0	0	0	4	0	0	0	4	0	0	0	4	0	0	3	0	0	0	0	0	0	0	0	0	4
18	1	1	4	7	33.255	36.1835	6	6.5	100	140	200	200	190	190	100	150	2	3	2	1	3	1	2	4	2	3	2	4	3	2	3	3	1	2	2	3	1	1	4	2	3	1	2	2	3	0	1	2	4
19	0	1	10	10	30.3265	30.3265	4.5	5	130	130	100	240	120	250	100	140	3	0	40	4	0	2	3	4	0	0	4	0	0	0	4	1	2	0	1	0	4	4	4	1	4	0	0	0	3	0	0	0	4
21	1	1	6	7	27.398	27.398	3.5	4	130	140	170	210		200	120	140	4	0	2	0	3	0	2	0	1	0	0	4	0	3	0	4	0	1	0	1	3	0	0	2	0	0	0	1	2	0	1	1	4
22	0	1	6	5	21.541	18.6125	1.5	1	110	90	110	170	120	120	120	110	4	0	4	0	4	1	0	4	0	1	0	1	4	1	20	1	1	0	4	2	0	0	4	1	0	0	4	0	4	0	1	2	4
23	1	1	2	3	21.541	21.541	1.5	2	120	70	180	90	160	90	80	80	2	0	3	0	2	0	1	2	1	0	0	4	0	0	0	0	0	0	2	0	0	1	2	1	2	1	1	0	1	0	1	1	3
24	0	1	4	5	27.398	21.541	3.5	1.5	80	50	90	180	100	140	110	60	0	1	2	0	0	1	0	1	0	0	1	1	0	1	1	0	0	1	0	2	1	1	1	1	4	0	2	2	1	1	1	0	0
25	1	1	6	6	27.398	30.3265	3.5	5	110	110	100	150	90	140	130	150	0	1	0	0	4	0	0	1	0	0	0	4	2	0	0	4	0	0	1	0	0	0	0	0	0	0	0	0	4	0	0	0	4
26	0	1	4	5	21.541	24.4695	2	3	110	60	150	210	180	170	140	140	1	0	4	0	1	0	0	1	0	0	0	0	0	0	1	2	0	0	4	1	2	1	1	4	4	0	1	1	3	0	1	0	0
27	1	1	8	7	24.4695	30.3265	3	4.5	80	60	180	160	120	160	90	140	0	0	4	0	3	0	0	0	0	0	0	4	0	0	0	2	0	0	1	0	0	0	0	2	0	1	0	0	0	2	0	2	4
28	1	1	10	8	21.541	27.398	2	4	12	90	200	210	200	180	100	70	3	2	4	0	4	3	0	4	0	2	2	4	3	0	4	0	0	4	0	0	0	0	4	0	4	2	2	0	4	1	0	0	4
30	1	2	4	8	33.255	30.3265	6	4.5	60	80	100	150	90	70	80	80	1	0	0	0	4	0	0	1	0	0	0	4	3	0		3	0	0	0	0	1	0	0	1	1	0	1	1	3	0	0	0	4
31	1	2	4	4	33.255	27.398	5.5	4	110	60	150	220	100	190	60	90	3	1	4	0	2	1	0	2	1	1	0	4	3	2	1	4	3	1	2	0		4	3	1	4	0	0	3	4	0			3
32	1	2	8	6	33.255	27.398	6	3.5	100	50	150	120	160	120	120	90	0	1	2	3	4	0	1	2	3	4	0	1	4	2	1	1	3	3	0	4	4	3	0	1	2	3	4	0	1	4	0	2	4
33	1	2	4	3	24.4695	21.541	3	2	60	70	160	150	160	120	120	90	0	0	2	0	3	0	0	4	0	0	0	0	0	0	0	4	0	0	4	0	0	1	0	0	0	0	0	0	0	0	0	0	0
34	0	2	6	8	27.398	30.3265	3.5	4.5	100	60	190	90	180	90	130	70	0	1	2	0	4	2	1	0	2	1	0	3	2	1	1	4	1	0	3	1	0	0		2	0	3	2	0	4	0	0	0	4
36	1	2	5	4	39.112	30.3265	8	4.5	100	90	150	110	140	140	120	100	1	0	1	0	3	0	0	1	0	0	0	4	1	0	0	2	0	0	1	0	0	0	3	0	0	0	0	0	0	0	0	0	3
37	1	2	6	8	30.3265	30.3265	4.5	5	110	60	200	120	160	170	110	70	0	0	3	0	4	0	1	1	0	0	0	3	0	0	1	3	0	0	2	0	0	0	1	0	3	0	0	0	0	0	0	1	4
38	1	2	8	8	39.112	30.3265	8	4.5	100	90	190	150	180	140	130	90	1	0	3	0	2	0	2	3	0	0	0	4	2	1	1	2	0	0	3	0	0	1	1	1	0	0	0	0	1	0	0	3	4
40	0	2	10	10	21.541	21.541	1.5	2	70	90	180	170	160	130	120	60	0	0	4	0	2	0	2	0	2	0	0	3	3	1	0	2	0	0	3	1	1	2	2	1	3	0	0	1	0	1	0	0	4
41	0	2	10	4	21.541	21.541	2	1.5	70	70	190	100	200	90	120	80	4	0	2	0	3	0	0	0	0	0	0	4	0	0	0	3	0	0	2	0	0	0	0	2	2	0	0	0	3	0	0	0	4
42	1	2	10	10	18.6125	18.6125	1	1	100	80	200	230	130	160	120	120	3	0	4	2	0	0	0	4	4	2	1	4	4	4	1	4	4	0	4	3	4	0	4	2	0	1	0	4	4	1	2	0	4
43	0	2	6	4	24.4695	24.4695	3	2.5	70	80	140	170	120	160	110	90	0	2	0	0	4	2	3	1	1	0	1	4	0	2	0	3	0	0	1	1	0	0	2	0	0	0	1	0	4	0	0	1	4
44	0	2	7	4	27.398	30.3265	4	4.5	80	70	110	180	140	230	130	160	4	0	1	0	4	1	0	0	2	0	0	4	0	0	0	4	0	0	0	0	0	0	0	4	2	0	1	0	2	0	0	1	4
45	0	2	2	4	24.4695	-19.458	3		70	80	180	200	150		70		0	0	3	1	0	4	0	0	4	2	0	0	4	0	3	0	0	2	4	0	0	4	0	0	4	1	2	0	3	0	0		0
46	1	2	8	6	21.541	24.4695	2	2.5	50	60	130	130	120	110	80	90	0	1	4	0	3	0	0	0	0	0	0	3	2	0	4	3	0	0	3	0	0	0	2	0	2	0	0	0	1	0	0	4	3
47	0	2	5	4	30.3265	24.4695	4.5	3	130	160	160	220	120	120	120	110	1	0	2	0	3	0	0	0	0	1	0	4	1	0	0	4	0	0	2	1	0	1	0	0	0	0	0	0	1	0	0	0	4
48	0	2	5	4	24.4695	21.541	2.5	1.5	140	80	190	200	150	160	110	90	1	0	2	0	3	0	0	0	0	2	2	4	1	0	0	3	0	1	1	2	0	1	1	1	0	1	1	0	2	0	0	0	4
49	0	2	1	1	30.3265	30.3265	4.5	4.5	90	70	180	120	160	100	140	80	2	0	1	0	2	0	0	0	0	0	0	3	0	0	0	2	0	0	1	0	0	0	4	0	0	0	0	0	4	0	0	0	3
50	1	2	6	6	27.398	24.4695	4	2.5	80	70	160	200	150	190	90	70	0	0	3	0	4	0	0	0	0	0	0	4	3	0	1	4	0	0	0	0	0	0	0	0	4	0	0	0	0	0	0	0	4
51	1	2	6	8	24.4695	24.4695	3	2.5	80	80	140	180	140	160	130	200	2	0	3	0	3	1	3	2	1	0	0	4	1	0	1	2	0	3	1	1	0	2	1	0	0	1	1		2	0	0	1	4
52	1	2	6		24.4695	21.541	2.5	1.5	70	100	180	230	190	200	130	100	2	0	3	0	4	2	3	0	0	0	0	4	1	0	0	3	4	1	1	4	0	0	3	1	0	0	0	0	4	4	0	0	4
53	1	2	10	9	36.1835	24.4695	6.5	3	70	70	140	120	120	100	100	70	0	0	0	0	4	0	0	1	0	0	0	4	2	1	0	4	0	0	2	0	0	4	3	1	3	0	0	0	3	0	0	0	4
54	1	2	4	10	21.541	21.541	2	2	90	60	170	100	160	80	110	70	1	0	0	1	3	0	1	2	0	0	1	2	0		0	2	0	1	1	3	0	1	1	0	3	0	0	0	2	2	0	0	3
55	1	2	4	0	33.255	30.3265	6	5	80	50	200	130	190	100	120	70	0	4	3	0	0	1	0	0	3	4	4	0	4	0	4	0	0	4	4	4	0	4	0	0	1	4	4	0	3	4	0	4	0
56	0	2	6	4	18.6125	18.6125	0.5	0.5	60	80	90	100	70		60		1		2	0	4	1	1	0	0	0	0	4	0	0	1	1	0	1	0	3	1	3	2	2	0	3	0	2	3	0	4	0	4
57	1	2	8	6	24.4695	21.541	2.5	1.5	70	80	160	90	110	100	90	90	2	1	3	0	2	1	2	1	1	1	0	0	3	1	1	1	1	1	4	2	0	3	1	2	3	0	1	0	3	2	1	0	3
58	0	2	2	3	18.6125	21.541	1	1.5	70	80	100	80	90	100	120	90	1	0	4	0	1	1	0	3	2	0	0	3	4	1	1	0	0	0	2	0	0	1	1	2	0	0	2	2	4	0	0	0	2
59	0	2	0	1	36.1835	30.3265	6.5	4.5	70	80	200	111	170	80	160	80	2	0	1	0	2	0	0	0	0	0	0	3	0	0	0	2	0	0	1	0	0	0	4	0	0	0	1	0	4	0	0	0	3
60	1	2	8	8	27.398	21.541	4	2	90	70	170	120	130	140	130	100	0	0	1	0	2	0	0	0	0	0	0	2	0	0	1	2	0	0	2	0	0	0		0	1	0	0	0	0	0	0	0	3
61	0	2	8	5	30.3265	27.398	5	3.5	70	70	200	120	180	100	100	80	0	0	4	0	2	0	0	2	0	0	0	1	4	1	0	0	0	0	4	0	0	0	3	1	2	0	0	0	3	0	1	2	2
62	1	2	8	6	24.4695	24.4695	3	2.5	70	70	170	100	130	90	120	70	4	0	2	0	4	2	0	4	0	0	0	4	2	0	2	4	3	0	4	3	4	4	4	3	3	0	0	0	4	0	0	0	4
63	1	2	10	3	39.112	27.398	8	3.5	80	100	100	90	100	100	80	110	0	0	1	0	2	0	0	1	0	0	0	4	0	0	0	4	0	0	0	1	0	1	2	0	2	1	1	0	1	0	0	0	4
66	1	3	9		24.4695	27.398	2.5	3.5	70	80	180	140	130	130	110	60	0	0	3	0	3	0	0	1	1	0	0	3	3	1		3	1	0	1	0	1	2	4	1	3	0	0	0	3	0	1	0	3
68	0	3	6	8	18.6125	18.6125	1	1	90	70	130	100	120	80	110	80	1	0	3	0	0	0	1	1	2	0	1	0	1	0	3	0	0	0	4	1	0	1	1	0	3	0	0	0	1	0	0	0	0
69	0	3	3	9	24.4695	27.398	3	4	100	90	110	160	100	150	100	130	2	4	4	1	0	1	4	4	4	3	1	0	4	4	4	2	4	4	4	2	0	3	0	2	4	4	2	0	0	0	4		4
70	1	3	6	7	21.541	21.541	2	2	80	70	170	70	160	8	90	90	2	1	1	0	4	1	0	0	0	0	0	4	0	1	1	4	0	0	4	4	0	0	0	0	0	0	0	0	4	4	0	0	4
71	0	3	4	5	24.4695	24.4695	3	3	110	80	190	140	160	120	120	90	0	1	3	0	4	0	0	2	0	0	0	4	4	1	3	4	0	0	2	4	0	0	4	1	4	3	0	1	4	0	0	0	4
72	1	3	3	9	30.3265	33.255	4.5	6	90	80	240	200	150	140	120	120	2	1	4	0	4	1	1	3	3	2	0	4	3	0	1	0	1	0	3	4	1	0	3	0	1	0	0	1	3	0	0	1	3
73	0	3	4	6	24.4695	24.4695	2.5	2.5	100	70	190	150	160	140	130	110	2	1	3	1	2	0	0	0	0	1	1	2	0	1	0	0	1	0	2	3	0	2	0	3	0	2	1	0	1	0	0	0	3
74	1	3	4	2	24.4695	24.4695	3	3	70	70	100	90	80	140	110	60	0	0	2	0	3	0	0	0	3	0	1	3	0	0	1	1	0	0	1	1	0	3	0	0	3	0	0	0	0	0	0	0	3
76	1	3	10	10	24.4695	21.541	3	2	85	71	117	117	77	71	73	74	0	0	0	0	0	0	0	0	0	0	0	0	0	0	0	0	0	0	4	0	0	0	0	0	0	0	0	0	0	0	0	0	3
77	1	3	8	3	39.112	27.398	7.5	4	70	100	210	140	170	160	140	120	0	1	2	0	2	0	3	1	0	0	0	3	2	2	0	4	1	0	1	1	0	2	2	1	1	2	2	0	1	2	0	2	3
78	0	3	9	7	30.3265	27.398	4.5	4	110	100	210	190	170	160	140	120	0	1	0	3	3	1	4	1	0	1	2	3	1	2	1	3	1	1	2	4	2	2	1	1	1	1	3	1	3	1	0	1	3
79	0	3	6		27.398	24.4695	3.5	3	100	70	150	180	100	110	80	80	2	2	4	0	3	2	0	3	0	3	1	3	1	4	0	0	2	0	3	3	4	2	2	1	3	4	3	0	2	0	0	0	3
80	0	3	6		24.4695	21.541	3	2	80	70	140	127	120	127	100	90	3	0	4	1	2	2	2	2	1	1	1	2	0	1	0	2	1	0	2	3	0	3	1	2	4	0	2	0	2	0	0	3	2
81	0	3	8	7	30.3265	21.541	5	2	70	80	130	170	120	140	80	107	3	0	3	1	3	1	2	2	2	1	1	3	3	2		3	1	2	2	1	0	2	1	1	3	1	2		2	0			2
82	1	3	8	4	27.398	24.4695	3.5	3	120	80	150	120	160	120	130	120	1	0	3	1	3	0	0	1		0	0	4	2	0		4	1	0	4	0		0	1	0	2	0	0	1	0	2	0	3	2
83	1	3	10	10	27.398	24.4695	3.5	3	80	70	160	81	130	95	120	74	0	0	1	2	2	0	0	0	0	0	0	3	0	0	0	3	0	0	4	0	0	0	1	0	0	0	0	0	1	0	0	0	3
84	1	3	3	3	27.398	24.4695	3.5	2.5	80	106	120	132	100	98	90	64	1	0	2	0	3	0	0	0	0	0	0	3	0	0	0	4	0	0	0	0	0	0	0	0	0	0	0	0	0	0	0	0	4
85	0	3	6		30.3265	24.4695	4.5	3	70	71	140	108	90	105	70	80	2	0	1	1	2	1	0	2	0	0	2	3	2	1	1	2	1	1	3	3	0	3	3	2	4	0	2	3	3	0			3
[truncated: 164 more columns]
